# Supplementary material for: Transition From Substance-Induced Psychosis to Schizophrenia Spectrum Disorder or Bipolar Disorder
Source: Atypon-hosted journal article supplement (doi:10.1176/appi.ajp.22010076), 2023-05-03
Supplement: appi.ajp.22010076.ds001.pdf [file appi.ajp.22010076.ds001.pdf]

**Table S1.** Patient characteristics, measures of substance-induced psychosis, and cumulative hazard for subsequent diagnosis of schizophrenia (F20) during follow-up in a Norwegian registry study

|                                                             | Patients<br>N | Age at index diagnosis |        | Transition to schizophrenia |                     |             |
|-------------------------------------------------------------|---------------|------------------------|--------|-----------------------------|---------------------|-------------|
|                                                             |               | Mean (SD)              |        | N                           | Cumulative hazard % | (95% CI)    |
| Any substance-induced psychosis                             | 3,755         | 33.7                   | (12.1) | 470                         | 18.8                | (17.0-20.7) |
| Male                                                        | 2 744         | 33.4                   | (11.8) | 374                         | 20.5                | (18.4-22.9) |
| Female                                                      | 1011          | 34.7                   | (12.8) | 96                          | 14.1                | (11.5-17.3) |
| Age (years) at index diagnosis                              |               |                        |        |                             |                     |             |
| 18-25                                                       | 1,234         |                        |        | 212                         | 25.1                | (21.8-28.9) |
| 26-30                                                       | 673           |                        |        | 105                         | 22.5                | (18.5-27.1) |
| 31-35                                                       | 495           |                        |        | 55                          | 18.1                | (13.9-23.4) |
| 36-40                                                       | 411           |                        |        | 43                          | 15.2                | (11.3-20.3) |
| 41-45                                                       | 309           |                        |        | 28                          | 16.0                | (9.3-26.7)  |
| 46-50                                                       | 262           |                        |        | 15                          | 8.7                 | (5.0-14.9)  |
| 51-79                                                       | 371           |                        |        | 12                          | 4.3                 | (2.4-7.6)   |
| Emergency admissions related to substance-induced psychosis |               |                        |        |                             |                     |             |
| No emergency admissions                                     | 942           | 33.0                   | (12.2) | 108                         | 15.9                | (13.2-19.2) |
| One emergency admission                                     | 1,972         | 34.4                   | (12.7) | 197                         | 14.0                | (12.1-16.2) |
| Repeated emergency admissions                               | 841           | 33.0                   | (10.3) | 165                         | 28.1                | (24.0-32.6) |
| Substance                                                   |               |                        |        | <10                         | —                   | —           |
| Alcohol                                                     | 506           | 46.7                   | (14.7) | 18                          | 5.1                 | (3.1-8.3)   |
| Opioids                                                     | 79            | 39.9                   | (12.4) | <10                         | —                   | —           |
| Cannabis                                                    | 669           | 27.1                   | (8.1)  | 123                         | 26.2                | (22.0-31.0) |
| Sedatives and hypnotics                                     | 71            | 40.3                   | (12.9) | <10                         | —                   | —           |
| Cocaine                                                     | 28            | 28.0                   | (7.0)  | <10                         | —                   | —           |
| Amphetamines                                                | 843           | 33.3                   | (9.8)  | 102                         | 18.7                | (15.3-22.7) |
| Hallucinogens                                               | 76            | 28.5                   | (11.2) | <10                         | —                   | —           |
| Volatile solvents                                           | <10           | —                      | —      | <10                         | —                   | —           |
| Multiple substances                                         | 1,479         | 32.2                   | (10.2) | 210                         | 21.5                | (18.5-24.9) |

**Table S2.** Gender-wise hazard ratios for transition from substance-induced psychosis to schizophrenia (F20), according to age, number of emergency admissions related to substance-induced psychosis, and type of substance-induced psychosis

|                                                             | Men   |      |                      |                          |                                 | Women |      |                      |                          |                                 |
|-------------------------------------------------------------|-------|------|----------------------|--------------------------|---------------------------------|-------|------|----------------------|--------------------------|---------------------------------|
|                                                             | n     | HR   | Unadjusted (95 % CI) | Adjusted <sup>a</sup> HR | Adjusted <sup>a</sup> (95 % CI) | n     | HR   | Unadjusted (95 % CI) | Adjusted <sup>a</sup> HR | Adjusted <sup>a</sup> (95 % CI) |
| Age (years) at first substance-induced psychotic episode    |       |      |                      |                          |                                 |       |      |                      |                          |                                 |
| Age18-25                                                    | 886   | 1.00 | Reference            | 1.00                     | Reference                       | 348   | 1.00 | Reference            | 1.00                     | Reference                       |
| Age26-30                                                    | 541   | 0.74 | (0.58-0.96)          | 0.77                     | (0.59-1.00)                     | 132   | 1.07 | (0.62-1.86)          | 1.07                     | (0.62-1.86)                     |
| Age31-35                                                    | 381   | 0.55 | (0.39-0.76)          | 0.57                     | (0.41-0.79)                     | 114   | 0.74 | (0.37-1.48)          | 0.76                     | (0.38-1.53)                     |
| Age36-40                                                    | 302   | 0.46 | (0.32-0.67)          | 0.50                     | (0.34-0.73)                     | 109   | 0.77 | (0.40-1.50)          | 0.79                     | (0.40-1.55)                     |
| Age41-45                                                    | 213   | 0.46 | (0.29-0.71)          | 0.52                     | (0.33-0.82)                     | 96    | 0.49 | (0.21-1.15)          | 0.52                     | (0.22-1.23)                     |
| Age46-50                                                    | 174   | 0.30 | (0.16-0.55)          | 0.38                     | (0.20-0.70)                     | 88    | 0.31 | (0.11-0.86)          | 0.38                     | (0.13-1.06)                     |
| Age51 -79                                                   | 247   | 0.16 | (0.08-0.32)          | 0.27                     | (0.13-0.57)                     | 124   | 0.26 | (0.09-0.71)          | 0.46                     | (0.15-1.35)                     |
| Emergency admissions related to substance-induced psychosis |       |      |                      |                          |                                 |       |      |                      |                          |                                 |
| No emergency admissions                                     | 683   | 1.00 | Reference            | 1.00                     | Reference                       | 259   | 1.00 | Reference            | 1.00                     | Reference                       |
| One emergency admission                                     | 1,457 | 0.91 | (0.70-1.19)          | 1.00                     | (0.77-1.30)                     | 515   | 1.16 | (0.67-2.03)          | 1.26                     | (0.72-2.22)                     |
| Repeated emergency admissions                               | 604   | 2.32 | (1.76-3.05)          | 2.53                     | (1.91-3.34)                     | 237   | 2.81 | (1.60-4.94)          | 3.00                     | (1.66-5.44)                     |
| Substance                                                   |       |      |                      |                          |                                 |       |      |                      |                          |                                 |
| Alcohol                                                     | 362   | 1.00 | Reference            | 1.00                     | Reference                       | 144   | 1.00 | Reference            | 1.00                     | Reference                       |
| Cannabis                                                    | 526   | 5.65 | (3.29-9.72)          | 3.20                     | (1.80-5.70)                     | 143   | 7.63 | (2.28-25.51)         | 4.82                     | (1.35-17.28)                    |
| Amphetamines                                                | 595   | 3.08 | (1.77-5.36)          | 1.81                     | (1.02-3.24)                     | 248   | 4.84 | (1.46-16.05)         | 2.87                     | (0.81-10.11)                    |
| Other substances <sup>b</sup>                               | 182   | 1.61 | (0.74-3.50)          | 1.03                     | (0.46-2.27)                     | 76    | 3.46 | (0.86-13.82)         | 2.88                     | (0.70-11.83)                    |
| Multiple substances                                         | 1,079 | 3.83 | (2.26-6.50)          | 2.17                     | (1.25-3.79)                     | 400   | 4.68 | (1.45-15.14)         | 2.73                     | (0.79-9.42)                     |

<sup>a</sup> Estimates of number of emergency admissions and type of substance-induced psychosis are adjusted for age group

<sup>b</sup> Other substances: opioids F11), sedatives and hypnotics F13), cocaine F14), hallucinogens F16) and volatile solvents F18).
